# Supplementary material for: Separation of Cellulose from Wastewater and Valorisation via Pyrolysis: A Case Study in the Czech Republic
Source: MDPI journal article supplement (doi:10.3390/resources13040051), 2024-04-05
Supplement: s1 [file s1]

**Figure S1.** Linear diagram of the WWTP and point in which the PCS was extracted from WW.
